# Supplementary material for: Visualizing Risk Prediction Models
Source: PubMed Central journal article supplement (PMC4503430; doi:10.1371/journal.pone.0132614), 2015-07-15
Supplement: pone.0132614.s006.pdf [file pone.0132614.s006.pdf]

S1 Table: Coefficients of the Cox model for the prediction of stroke after atrial fibrillation. TIA: transient ischemic attack.

| Predictor                         | $\beta$ |
|-----------------------------------|---------|
| Sex (1=Men, 2=Women)              | 0.6507  |
| Age, per y                        | 0.0291  |
| Systolic Blood Pressure, per mmHg | 0.0061  |
| Diabetes Mellitus                 | 0.5893  |
| Prior Stroke/TIA                  | 0.6316  |
