# Supplementary material for: Visualizing Risk Prediction Models
Source: PubMed Central journal article supplement (PMC4503430; doi:10.1371/journal.pone.0132614), 2015-07-15
Supplement: pone.0132614.s007.pdf [file pone.0132614.s007.pdf]

S2 Table: Table based representation of the stroke after atrial fibrillation score system. The points corresponding to the values of the predictors need to be added to each other to obtain the score (total number of points).

| Predictor                      | range or level | points |
|--------------------------------|----------------|--------|
| Age                            | 55-59          | 0      |
|                                | 60-62          | 1      |
|                                | 63-66          | 2      |
|                                | 67-71          | 3      |
|                                | 72-74          | 4      |
|                                | 75-77          | 5      |
|                                | 78-81          | 6      |
|                                | 82-85          | 7      |
|                                | 86-90          | 8      |
|                                | 91-93          | 9      |
| Sex                            | > 93           | 10     |
|                                | Men            | 0      |
| Systolic Blood Pressure, mm Hg | Women          | 6      |
|                                | < 120          | 0      |
|                                | 120-139        | 1      |
|                                | 140-159        | 2      |
|                                | 160-179        | 3      |
| Diabetes                       | > 179          | 4      |
|                                | No             | 0      |
| Prior Stroke or TIA            | Yes            | 5      |
|                                | No             | 0      |
|                                | Yes            | 6      |
