# Supplementary material for: Visualizing Risk Prediction Models
Source: PubMed Central journal article supplement (PMC4503430; doi:10.1371/journal.pone.0132614), 2015-07-15
Supplement: pone.0132614.s008.pdf [file pone.0132614.s008.pdf]

S3 Table: Conversion from points to risk for the stroke after atrial fibrillation score system. To obtain a risk estimate, the obtained score is linked with a risk estimate.

| score | estimated<br>5-Year<br>risk |
|-------|-----------------------------|
| 0-1   | 5%                          |
| 2-3   | 6%                          |
| 4     | 7%                          |
| 5     | 8%                          |
| 6-7   | 9%                          |
| 8     | 11%                         |
| 9     | 12%                         |
| 10    | 13%                         |
| 11    | 14%                         |
| 12    | 16%                         |
| 13    | 18%                         |
| 14    | 19%                         |
| 15    | 21%                         |
| 16    | 24%                         |
| 17    | 26%                         |
| 18    | 28%                         |
| 19    | 31%                         |
| 20    | 34%                         |
| 21    | 37%                         |
| 22    | 41%                         |
| 23    | 44%                         |
| 24    | 48%                         |
| 25    | 51%                         |
| 26    | 55%                         |
| 27    | 59%                         |
| 28    | 63%                         |
| 29    | 67%                         |
| 30    | 71%                         |
| 31    | 75%                         |
